# Supplementary material for: Quantifying the migration rate of drainage divides from high-resolution topographic data
Source: Copernicus journal article supplement (doi:10.5194/esurf-12-433-2024), 2024-03-07
Supplement: Supplementary file 1 [file esurf-12-433-2024-supplement.pdf]

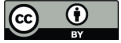

*Supplement of*

## **Quantifying the migration rate of drainage divides from high-resolution topographic data**

**Chao Zhou et al.**

*Correspondence to:* Xibin Tan ([tanxibin@imde.ac.cn](mailto:tanxibin@imde.ac.cn))

The copyright of individual parts of the supplement might differ from the article licence.

### Supplementary text

- The detailed derivation of Eq. (8).
- The drainage divide's migration rates at  $m = 0.35$  and  $0.55$  in the Wutai Shan.

### Supplementary figures

- **Figure S1.** Curves of the channel-head erosion rate ( $E_{ch}$ ) against the critical area ( $A_{cr}$ ) under different values of channel-head gradient ( $S_{ch}$ ).
- **Figure S2.** Geological map of the natural example, Wutai Shan.
- **Figure S3.** Precipitation distribution of the natural example, Wutai Shan.
- **Figure S4.** Normalized channel steepness ( $k_{sn}$ ) distribution in the Wutai Shan at  $m = 0.35$  and  $0.55$ .

### Supplementary Tables

- **Table S1.** The comparison of drainage divide's migration rates at  $m = 0.35$ ,  $0.45$ , and  $0.55$  in the Wutai Shan area.

## SUPPLEMENTARY TEXT

### Detailed derivation of Eq. (8)

According to the detachment-limited stream power model (Howard and Kerby, 1983; Howard, 1994):

$$E = KA^m S^n \quad (1)$$

The channel gradient ( $S$ ) can be written as:

$$S = \left(\frac{E}{K}\right)^{\frac{1}{n}} A^{-\left(\frac{m}{n}\right)} \quad (2)$$

A river's longitudinal elevation  $z(x)$  can be expressed by the integration of channel gradient ( $S$ ) in the upstream direction from a base level  $x_b$  to an observation point  $x$ :

$$z(x) = z_b + \int_{x_b}^x S(x) dx = z_b + \int_{x_b}^x \left(\frac{E(x)}{K(x)}\right)^{\frac{1}{n}} A(x)^{-\left(\frac{m}{n}\right)} dx \quad (3)$$

In the case of spatially invariant erosion rate ( $E$ ) and erosion coefficient ( $K$ ), Eq. (3) can be reduced to a simpler form:

$$z(x) = z_b + k_{sn} (A_0)^{-\left(\frac{m}{n}\right)} \chi \quad (4)$$

with

$$k_{sn} = \left(\frac{E}{K}\right)^{\frac{1}{n}} \quad (5)$$

and

$$\chi = \int_{x_b}^x \left(\frac{A_0}{A(x)}\right)^{\frac{m}{n}} dx \quad (6)$$

$A_0$  is an arbitrary scaling area, to make the integrand dimensionless. Assuming  $A_0 = 1\text{m}^2$ , the steepness ( $k_{sn}$ ) of channel-head-segment can be written as:

$$k_{sn} = \frac{z_{ch} - z_b}{\chi} \quad (7)$$

According to the Eq. (5), the erosion rate ( $E$ ) can be written as:

$$E = K k_{sn}^n = K \left(\frac{z - z_b}{(A_0)^{-\left(\frac{m}{n}\right)} \chi}\right)^n. \quad (8)$$

According to the equation of drainage-divide migration rate ( $D_{mr}$ ):

$$D_{mr} = \frac{\Delta E_{ch} - \Delta U_{ch}}{\tan\alpha + \tan\beta} = \frac{E_{ch(\alpha)} - E_{ch(\beta)} - \Delta U_{ch}}{\tan\alpha + \tan\beta} \quad (9)$$

Combing Eq. (7, 8 & 9), the drainage-divide migration rate ( $D_{mr}$ ) can be written as:

$$D_{mr} = \frac{E_{ch(\alpha)} - E_{ch(\beta)} - \Delta U_{ch}}{\tan\alpha + \tan\beta} = \frac{K k_{sn(\alpha)}^n - K k_{sn(\beta)}^n - \Delta U_{ch}}{\tan\alpha + \tan\beta} = \frac{K \left\{ \left[ \frac{(z_{ch} - z_b)_\alpha}{\chi_\alpha} \right]^n - \left[ \frac{(z_{ch} - z_b)_\beta}{\chi_\beta} \right]^n \right\} - \Delta U_{ch}}{\tan\alpha + \tan\beta} \quad (10)$$

### The drainage divide's migration rate at $m = 0.35$ and $0.55$ in the Wutai Shan

To calculate the drainage divide's migration rate at  $m = 0.35$  and  $0.55$  in the Wutai Shan, we first calculate the normalized channel steepness ( $k_{sn}$ ) values and use the Kriging interpolation method to generate the  $k_{sn}$  distribution map at  $m = 0.35$  (Fig. S4A) and  $0.55$  (Fig. S4B) in this area. Then we make 20 km wide swath profiles of the  $k_{sn}$  distribution map and derive the average  $k_{sn}$  values of the upthrown side near the Northern Wutai Shan fault, which are  $20 \text{ m}^{0.7}$  and  $350 \text{ m}^{1.1}$  at  $m = 0.35$  and  $0.55$ , respectively (Fig. S4). Combining with the  $0.5 \pm 0.25 \text{ mm/yr}$  erosion rate in the north Wutai Shan and using the equation of  $K = \frac{E}{k_{sn}^n}$  follow previous studies (Kirby and Whipple, 2001; Kirkpatrick et al., 2020; Ma et al., 2020), the erosion coefficients (K) are calculated to  $(25.00 \pm 12.50) \times 10^{-6} \text{ m}^{0.3} \text{ yr}^{-1}$  and  $(1.43 \pm 0.72) \times 10^{-6} \text{ m}^{-0.1} \text{ yr}^{-1}$  at  $m = 0.35$  and  $0.55$ , respectively (Table S1). Based on the channel-head-point method (Eq. 4) and using the required parameters as well as the calculated erosion coefficients (K) at  $m = 0.35$  and  $0.55$ , we derive the drainage divide's migration rate at  $m = 0.35$  and  $0.55$  (Table S1).

## SUPPLEMENTARY FIGURES

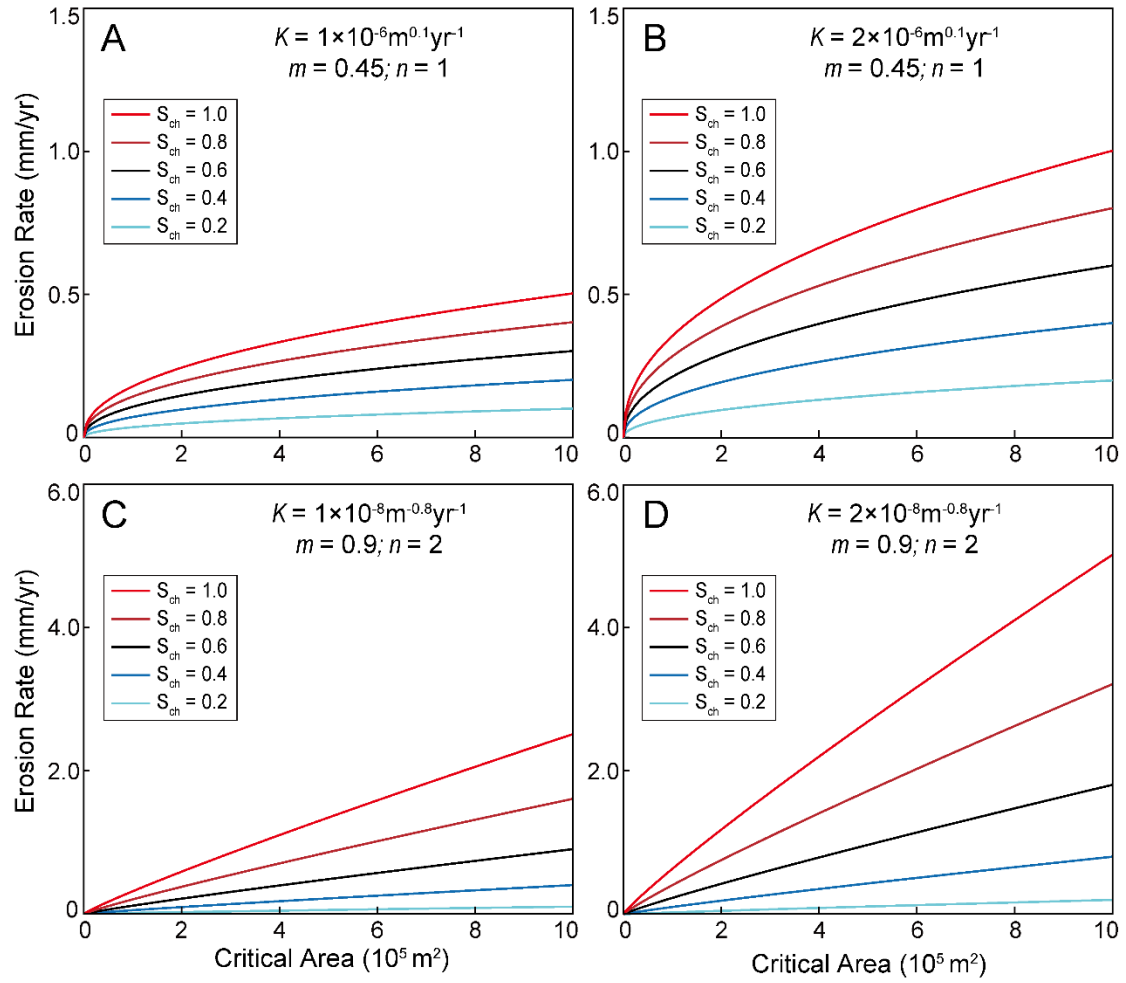

**Figure S1.** Curves of the channel-head erosion rate ( $E_{ch}$ ) against the critical area ( $A_{cr}$ ) under different values of channel-head gradient ( $S_{ch}$ ). (A) Curves of  $m = 0.45$ ,  $n = 1$  and  $K = 1 \times 10^{-6} \text{ m}^{0.1} \text{ yr}^{-1}$ ; (B) Curves of  $m = 0.45$ ,  $n = 1$  and  $K = 2 \times 10^{-6} \text{ m}^{0.1} \text{ yr}^{-1}$ ; (C) Curves of  $m = 0.9$ ,  $n = 2$  and  $K = 1 \times 10^{-8} \text{ m}^{-0.8} \text{ yr}^{-1}$ ; (D) Curves of  $m = 0.9$ ,  $n = 2$  and  $K = 2 \times 10^{-8} \text{ m}^{-0.8} \text{ yr}^{-1}$ .

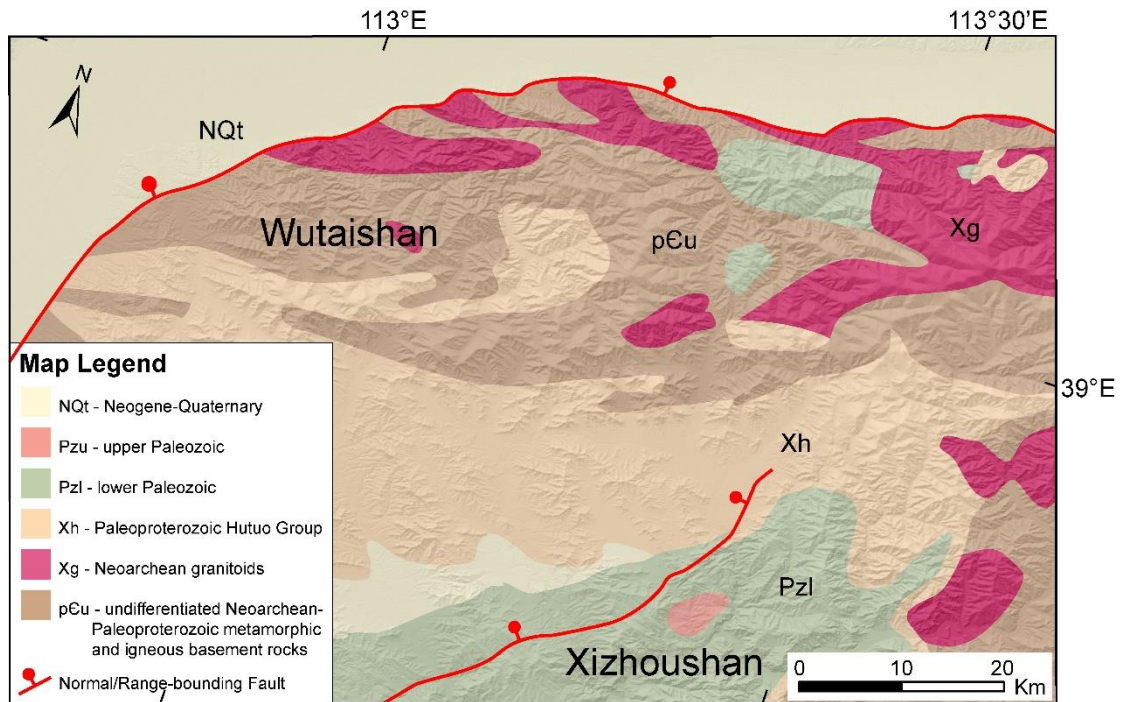

**Figure S2.** Geological map of the natural example, Wutai Shan. The map is revised according to Clinkscales et al. (2020). The northern catchment evolves mainly through the undifferentiated Neoproterozoic-Paleoproterozoic metamorphic and igneous basement rocks (pCu) and Neoproterozoic granitoids (Xg), whereas the southern catchment evolves mainly through the Paleoproterozoic Hutuo Group (Xh). There is no significant difference in rock erodibility on both sides of the drainage divide.

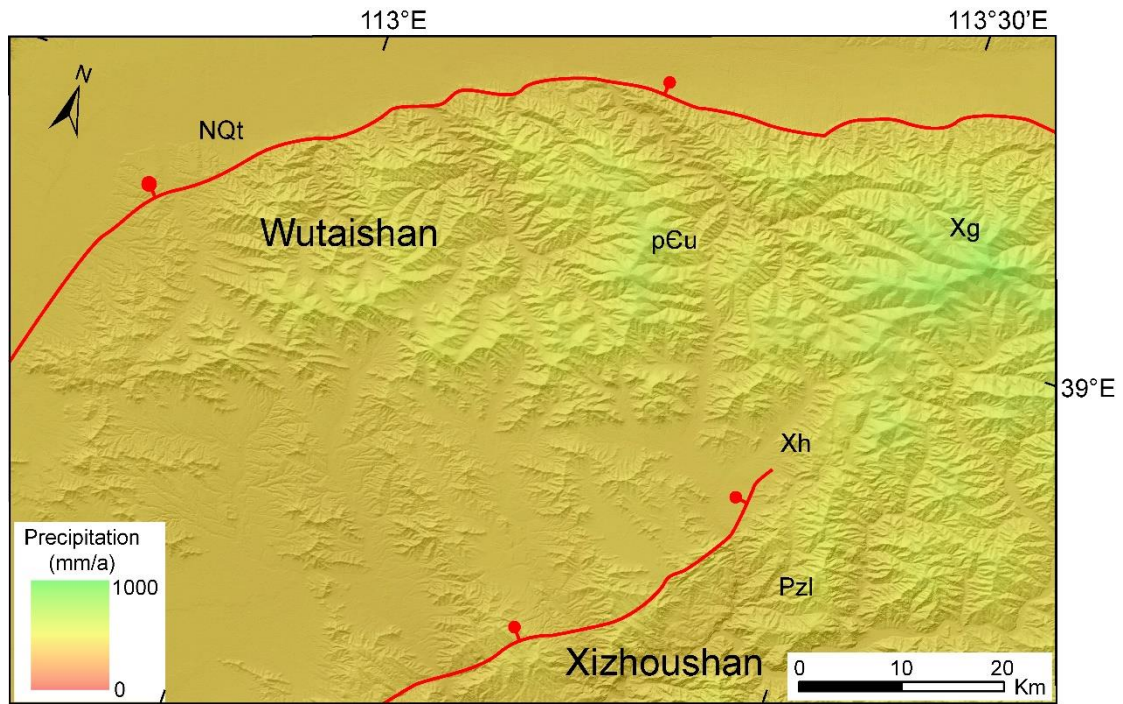

**Figure S3.** Precipitation distribution of the Wutai Shan. There is no significant difference in precipitation on both sides of the drainage divide, based on the precipitation data (1970-2000) from <http://worldclim.org>.

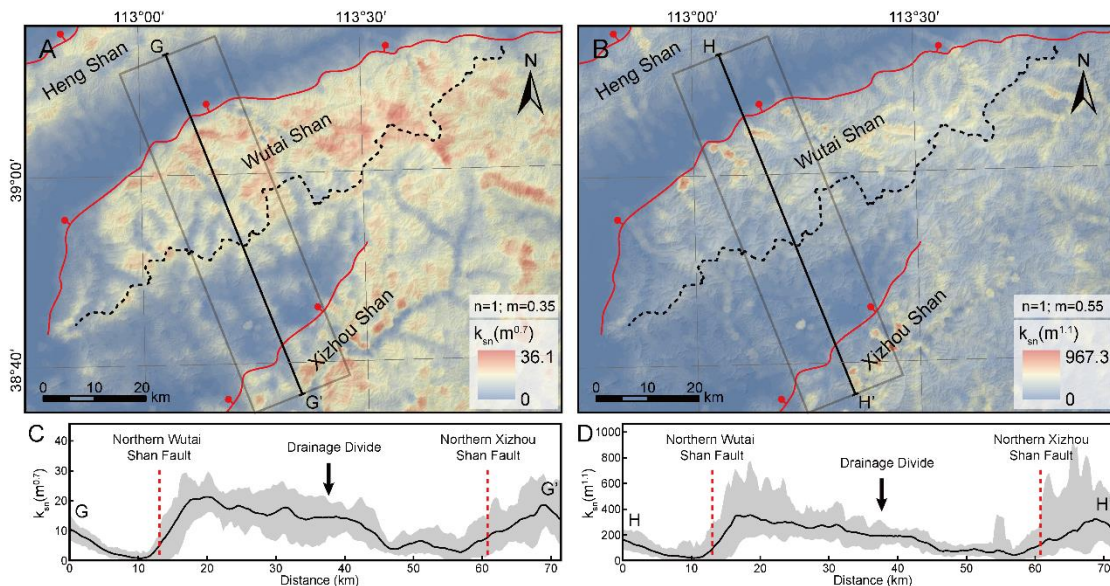

**Figure S4.** Normalized channel steepness ( $k_{sn}$ ) distribution in the Wutai Shan. (A) The  $k_{sn}$  distribution at  $m = 0.35$  and  $n = 1$ . (B) The  $k_{sn}$  distribution at  $m = 0.55$  and  $n = 1$ . The black dashed line shows the location of the main drainage divide. Red lines show

the main active faults. The black straight lines show the location of the profiles G-G' and H-H' and the gray rectangles show the area of the swath profiles in panel C&D. The topography data (ALOS DEM, 12.5 m resolution) is downloaded from the Alaska Satellite Facility (ASF) Data Search (<https://search.asf.alaska.edu/>). The  $k_{sn}$  is calculated using TopoToolbox (Schwanghart and Scherler, 2014), and the interpolation uses the Kriging method on ArcMap. (C) The  $k_{sn}$  swath profile along G-G' in panel A. (D) The  $k_{sn}$  swath profile along H-H' in panel B. The swath profiles are extracted using TopoToolbox (Schwanghart and Scherler, 2014). The red dashed lines show the location of the main active faults, and the black arrow shows the location of the main drainage divide. Both swath profiles are 20 km wide (10 km on each side). The extent of the swath profiles is represented by the grey boxes in Panel A&B.



## SUPPLEMENTARY TABLES

**Table S1.** The comparison of drainage divide's migration rates at  $m = 0.35, 0.45,$  and  $0.55$  in the Wutai Shan area.

| No.                    | $A_{cr}$<br>( $\times 10^5 \text{m}^2$ ) | $S_{ch}$ | $K$ ( $\times 10^{-6} \text{m}^{0.3} \text{yr}^{-1}$ )<br>( $n=1; m=0.35$ ) | $K$ ( $\times 10^{-6} \text{m}^{0.1} \text{yr}^{-1}$ )<br>( $n=1; m=0.45$ ) | $K$ ( $\times 10^{-6} \text{m}^{-0.1} \text{yr}^{-1}$ )<br>( $n=1; m=0.55$ ) | $\tan\alpha$ | $\tan\beta$ | $D_{mr}$ (mm/yr)<br>( $n=1; m=0.35$ ) | $D_{mr}$ (mm/yr)<br>( $n=1; m=0.45$ ) | $D_{mr}$ (mm/yr)<br>( $n=1; m=0.55$ ) |
|------------------------|------------------------------------------|----------|-----------------------------------------------------------------------------|-----------------------------------------------------------------------------|------------------------------------------------------------------------------|--------------|-------------|---------------------------------------|---------------------------------------|---------------------------------------|
| Fig. 4 I $_{\alpha}$   | 1.75                                     | 0.16     | 25.00 $\pm$ 12.50                                                           | 6.25 $\pm$ 3.13                                                             | 1.43 $\pm$ 0.72                                                              | 0.14         | 0.66        | -0.37 $\pm$ 0.18                      | -0.21 $\pm$ 0.10                      | -0.10 $\pm$ 0.05                      |
| Fig. 4 I $_{\beta}$    | 0.26                                     | 0.63     | 25.00 $\pm$ 12.50                                                           | 6.25 $\pm$ 3.13                                                             | 1.43 $\pm$ 0.72                                                              |              |             |                                       |                                       |                                       |
| Fig. 4 II $_{\alpha}$  | 0.79                                     | 0.23     | 25.00 $\pm$ 12.50                                                           | 6.25 $\pm$ 3.13                                                             | 1.43 $\pm$ 0.72                                                              | 0.24         | 0.70        | -0.36 $\pm$ 0.17                      | -0.23 $\pm$ 0.11                      | -0.14 $\pm$ 0.06                      |
| Fig. 4 II $_{\beta}$   | 0.30                                     | 0.67     | 25.00 $\pm$ 12.50                                                           | 6.25 $\pm$ 3.13                                                             | 1.43 $\pm$ 0.72                                                              |              |             |                                       |                                       |                                       |
| Fig. 4 III $_{\alpha}$ | 0.67                                     | 0.29     | 25.00 $\pm$ 12.50                                                           | 6.25 $\pm$ 3.13                                                             | 1.43 $\pm$ 0.72                                                              | 0.28         | 0.65        | -0.31 $\pm$ 0.15                      | -0.21 $\pm$ 0.10                      | -0.13 $\pm$ 0.06                      |
| Fig. 4 III $_{\beta}$  | 0.39                                     | 0.63     | 25.00 $\pm$ 12.50                                                           | 6.25 $\pm$ 3.13                                                             | 1.43 $\pm$ 0.72                                                              |              |             |                                       |                                       |                                       |

**Notes:** The calculation of the erosion coefficient ( $K$ ) is using the erosion rate in the north Wutai Shan ( $0.5\pm 0.25$  mm/yr), combing with its  $k_{sn}$  values of  $20 \text{ m}^{0.7}$ ,  $80 \text{ m}^{0.9}$ , and  $350 \text{ m}^{1.1}$  at  $m = 0.35, 0.45$  and  $0.55$ , respectively ( $k_{sn}$  results are in the Fig. 2 and Fig. S4). The calculation of the drainage divide's migration rates is based on the channel-head-point method (Eq. 4).
